# Supplementary material
Source: Springer Nature journal article supplement (https://www.springermedizin.de/resource/supplementary/12974_2011_488_MOESM7_ESM.pdf/9601402)

**A**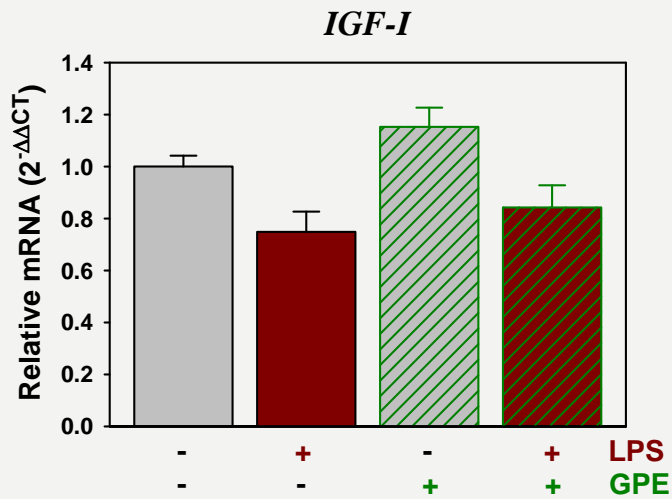**B**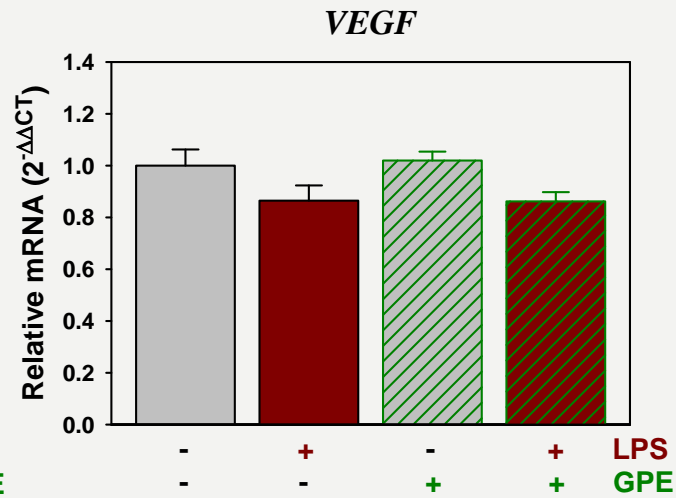**C**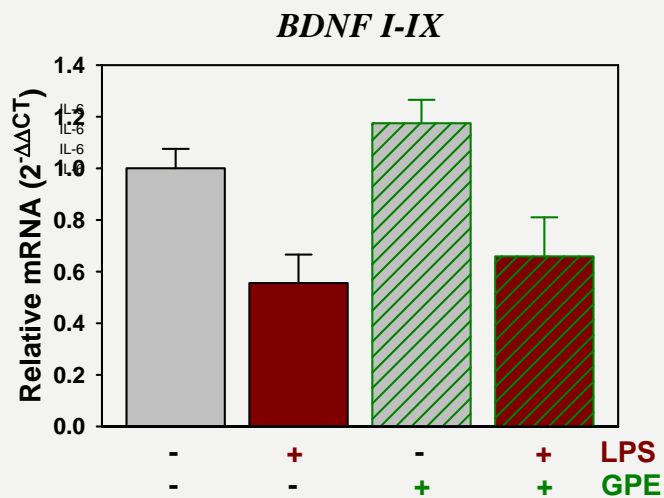**D**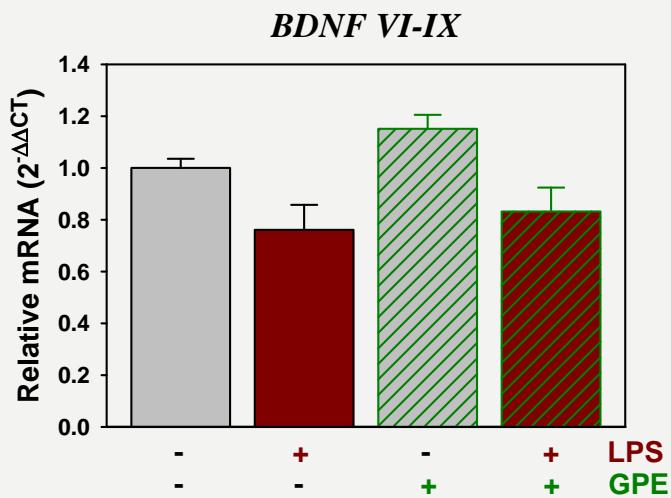

Supplement: MOESM7 [file 9601402]
